# Supplementary material
Source: Research Square preprint supplement (doi:10.21203/rs.3.rs-8981267/v1)
Supplement: Supplementary file 1 [file 9b4efda7dc0cba15cbaa3cfa.pdf]

## Supplementary

**Supplementary Table S1. Self-reported fatigue, affective symptoms, and somatic complaints in PCS and HC participants, with Bayesian inference.** Comparison of symptom severity between individuals with Post-COVID-19 Syndrome (PCS) and matched healthy controls (HC) across domains including fatigue (VAS, MFI), sleep (PSQI), autonomic function (COMPASS-31), post-exertional malaise, mood (HADS), PTSD, and fibromyalgia-related symptoms. Values are shown as mean (standard deviation), and group comparisons were conducted using independent samples t-tests or chi-squared tests, as appropriate. The Bayesian factor ( $BF_{10}$ ) is reported for each comparison, quantifying the strength of evidence in favor of the alternative hypothesis. Asterisks (\*) denote statistically significant differences at  $p < 0.05$  or  $BF_{10} > 1$ .

| Variable                         | PCS Mean (std)   | HC Mean (std)   | Statistics         | P-value                  | $B_{10}$   |
|----------------------------------|------------------|-----------------|--------------------|--------------------------|------------|
| Fatigue VAS                      | 5.500 (1.606)    | 1.850 (1.663)   | T(38)=7.061        | 2.036x10 <sup>-8*</sup>  | 876.874*   |
| Multidimensional fatigue         | 15.200 (3.205)   | 6.684 (2.212)   | T(38)=47.68        | 1.355x10 <sup>-11*</sup> | 1332.772*  |
| General Physical                 | 14.600 (2.998)   | 5.737 (2.884)   | T(38)=43.19        | 2.408x10 <sup>-11*</sup> | 4158.129*  |
| Reduced activity                 | 12.150 (3.703)   | 5.444 (2.307)   | T(38)=15.09        | 1.072x10 <sup>-7*</sup>  | 650.746*   |
| Reduced motivation               | 8.600 (3.393)    | 4.895 (2.378)   | T(38)=9.59         | 3.589x10 <sup>-4*</sup>  | 34.338*    |
| Mental fatigue                   | 12.850 (3.843)   | 6.053 (3.027)   | T(38)=21.41        | 4.391x10 <sup>-7*</sup>  | 767.860*   |
| ESS                              | 12.400 (5.548)   | 6.474 (4.234)   | T(37)=3.735        | 6.304x10 <sup>-4*</sup>  | 24.874*    |
| HADS Depression                  | 8.900 (2.954)    | 4.053 (2.345)   | T(37)=5.657        | 1.833x10 <sup>-6*</sup>  | 153.950*   |
| HADS Anxiety                     | 7.550 (3.790)    | 5.368 (2.477)   | T(37)=2.116        | 0.041*                   | 1.287*     |
| PTSD total score                 | 19.750 (10.208)  | 6.105 (8.185)   | T(37)=4.590        | 4.964x10 <sup>-5*</sup>  | 59.715*    |
| De Paul's PEM                    | 2.950 (0.945)    | 0.421 (0.449)   | T(37)=10.584       | 9.541x10 <sup>-13*</sup> | 64546.865* |
| De Paul's Unrefreshing sleep     | 3.400 (0.821)    | 1.316 (0.749)   | T(37)=8.269        | 6.229x10 <sup>-10*</sup> | 1547.301*  |
| De Paul's Autonomic symptoms     | 1.775 (0.881)    | 0.553 (0.550)   | T(37)=5.166        | 8.438x10 <sup>-6*</sup>  | 73.625*    |
| De Paul's Neurocognitive         | 1.775 (0.910)    | 0.474 (0.612)   | T(37)=5.212        | 7.316x10 <sup>-6*</sup>  | 401.197*   |
| De Paul's Immune                 | 2.250 (0.993)    | 0.658 (0.834)   | T(37)=5.405        | 4.010x10 <sup>-6*</sup>  | 381.905*   |
| COMPASS total score              | 62.413 (19.629)  | 30.666 (19.158) | T(37)=5.108        | 1.011x10 <sup>-5*</sup>  | 569.590*   |
| Global PSQI                      | 15.200 (6.542)   | 9.263 (5.791)   | T(37)=2.995        | 0.005*                   | 15.254*    |
| MRC                              | Stage 1: 9       | 19              |                    |                          | N/A        |
| Dyspnea                          | Stage 2: 9       | 1               |                    |                          |            |
| Scale                            | Stage 3: 2       | 0               | $\chi^2(5)=11.971$ | 0.003*                   |            |
| MoCA                             | 26.8 (2.55)      | 26.5 (1.54)     | T(37)=0.430        | 0.668                    | 0.420      |
| Pain detect                      | 9.00(6.53)       | 1.7 (1.84)      | T(37)= 4.813       | <0.001*                  | 1315.956*  |
| WPI                              | 5.45 (4.07)      | 1.00 (1.62)     | T(37)=4.541        | <0.001*                  | 119.442*   |
| SS                               | 8.55 (1.88)      | 1.75 (1.68)     | T(37)=12.066       | <0.001*                  | 13663.606* |
| Fibromyalgia diagnostic criteria | Yes: 8<br>No: 12 | Yes:0<br>No:20  | $\chi^2(2)=10.581$ | 0.005*                   | N/A        |

**Supplementary Table S2. Comparison of standard blood parameters between PCS and healthy control participants.** Descriptive statistics and group comparisons for hematological, biochemical, and inflammatory markers in individuals with Post-COVID-19 Syndrome (PCS) and matched healthy controls (HC). Results are reported as mean (standard deviation). Between-group comparisons were conducted using the Mann–Whitney U test (W), with corresponding p-values and Bayesian factors (BF<sub>10</sub>) reported for each variable. Asterisks (\*) denote statistically significant differences at  $p < 0.05$  or  $BF_{10} > 1$ .

| Variable                   | PCS Mean (SD)     | HC Mean (SD)     | Statistics W | P-value | B <sub>10</sub> |
|----------------------------|-------------------|------------------|--------------|---------|-----------------|
| Sodium                     | 140.118 (2.619)   | 140.474 (2.091)  | 161.00       | 1.00    | 0.369           |
| Potassium                  | 3.965 (0.237)     | 4.000 (0.252)    | 126.00       | 0.53    | 0.334           |
| Urea                       | 4.135 (1.346)     | 4.337 (0.942)    | 158.50       | 0.94    | 0.359           |
| Creatinine                 | 61.235 (8.318)    | 68.632 (11.847)  | 101.50       | 0.06    | 1.232*          |
| Glucose                    | 4.871 (0.819)     | 4.968 (1.106)    | 157.00       | 0.90    | 0.329           |
| Calcium_corrected          | 2.268 (0.059)     | 2.288 (0.109)    | 159.00       | 0.95    | 0.341           |
| Phosphatase                | 1.088 (0.166)     | 1.171 (0.163)    | 106.00       | 0.08    | 0.749           |
| Proteins_total             | 71.000 (3.691)    | 71.526 (3.878)   | 148.50       | 0.69    | 0.337           |
| Albumin                    | 47.000 (1.969)    | 47.000 (2.749)   | 154.50       | 0.83    | 0.326           |
| Bilirubin_total            | 10.125 (6.672)    | 9.824 (7.170)    | 116.00       | 0.48    | 0.370           |
| ALP                        | 64.176 (15.204)   | 63.947 (23.710)  | 145.50       | 0.62    | 0.362           |
| AST                        | 23.353 (6.441)    | 22.316 (7.521)   | 131.00       | 0.34    | 0.420           |
| Gamma_GT                   | 13.059 (3.508)    | 31.632 (47.978)  | 97.50        | 0.04    | 1.735*          |
| Magnesium                  | 0.859 (0.043)     | 0.872 (0.054)    | 151.50       | 0.76    | 0.347           |
| CRP_recoded                | 1.353 (0.606)     | 1.368 (0.597)    | 158.50       | 0.92    | 0.397           |
| Globulin                   | 23.529 (3.875)    | 24.526 (2.674)   | 138.50       | 0.47    | 0.497           |
| Ferritin                   | 108.353 (103.511) | 99.789 (84.020)  | 156.50       | 0.89    | 0.307           |
| WCC                        | 6.629 (1.662)     | 6.501 (1.803)    | 156.50       | 0.89    | 0.336           |
| RCC                        | 4.385 (0.457)     | 4.561 (0.386)    | 112.50       | 0.12    | 0.843           |
| Hemoglobin                 | 134.000 (13.224)  | 137.263 (10.514) | 138.50       | 0.48    | 0.426           |
| Haematocrit                | 0.403 (0.036)     | 0.417 (0.029)    | 120.00       | 0.19    | 0.739           |
| MCV                        | 91.988 (4.276)    | 91.679 (5.684)   | 159.00       | 0.95    | 0.329           |
| MCH                        | 30.624 (1.719)    | 30.200 (2.149)   | 151.00       | 0.75    | 0.348           |
| MCHC                       | 332.882 (11.931)  | 329.158 (8.662)  | 128.50       | 0.30    | 0.504           |
| RDW                        | 12.406 (0.599)    | 12.474 (0.726)   | 154.50       | 0.84    | 0.329           |
| Platelet_count             | 267.118 (42.355)  | 289.789 (45.281) | 105.00       | 0.08    | 1.123*          |
| MPV                        | 10.988 (0.834)    | 10.716 (0.727)   | 121.00       | 0.20    | 0.463           |
| Neutrophils                | 4.142 (1.178)     | 3.773 (1.409)    | 135.50       | 0.42    | 0.414           |
| Lymphocytes                | 1.934 (0.550)     | 2.029 (0.650)    | 144.50       | 0.60    | 0.334           |
| Monocytes                  | 0.441 (0.102)     | 0.441 (0.127)    | 155.00       | 0.85    | 0.319           |
| Eosinophils                | 0.141 (0.100)     | 0.214 (0.243)    | 147.50       | 0.67    | 0.365           |
| Basophils                  | 0.052 (0.030)     | 0.042 (0.018)    | 136.00       | 0.42    | 0.486           |
| Immature_Granulocyte_Count | 0.022 (0.016)     | 0.022 (0.012)    | 141.50       | 0.51    | 0.327           |
| ESR                        | 7.588 (6.662)     | 8.278 (8.072)    | 139.50       | 0.67    | 0.354           |
| TSH                        | 1.819 (0.630)     | 1.633 (0.658)    | 124.50       | 0.25    | 0.423           |

|                |                |                |        |      |       |
|----------------|----------------|----------------|--------|------|-------|
| <b>T4_free</b> | 15.124 (1.759) | 15.042 (1.624) | 156.00 | 0.87 | 0.321 |
| <b>NLR</b>     | 2.209 (0.594)  | 2.038 (1.137)  | 125.50 | 0.26 | 0.540 |
| <b>MLR</b>     | 0.234 (0.041)  | 0.230 (0.072)  | 156.00 | 0.87 | 0.346 |

**Supplementary Table S3. Serum cytokines and glial biomarkers in PCS and healthy control participants.** Group comparisons for circulating immune markers (interleukins, interferon- $\gamma$ , TNF- $\alpha$ ) and glial markers (S100 $\beta$ , GFAP) measured in serum samples from individuals with Post-COVID-19 Syndrome (PCS) and healthy controls (HC). Data are reported as mean (standard deviation). Concentrations are in pg/mL. Between-group differences were evaluated using the Mann-Whitney U test (W), with corresponding p-values and Bayes Factors (BF<sub>10</sub>). Asterisks (\*) indicate statistically suggestive effects (BF<sub>10</sub> > 1)

| Variable                      | PCS Mean (SD) | HC Mean (SD)  | Statistics W | P-value | B <sub>10</sub> |
|-------------------------------|---------------|---------------|--------------|---------|-----------------|
| <b>IFN<math>\gamma</math></b> | 4.639 (8.032) | 4.182 (8.177) | 151.000      | 0.789   | 0.345           |
| <b>IL1b</b>                   | 0.345 (0.745) | 0.094 (0.061) | 195.000      | 0.300   | 0.573           |
| <b>IL6</b>                    | 1.197 (2.795) | 0.418 (0.205) | 194.000      | 0.478   | 0.431           |
| <b>TNF<math>\alpha</math></b> | 1.164 (1.799) | 0.980 (0.316) | 110.000      | 0.116   | 1.094*          |
| <b>IL10</b>                   | 0.576 (1.145) | 0.229 (0.141) | 171.000      | 0.449   | 0.365           |
| <b>IL13</b>                   | 0.998 (0.889) | 1.228 (0.894) | 127.000      | 0.563   | 0.398           |
| <b>IL8</b>                    | 6.106 (4.671) | 6.581 (2.791) | 126.000      | 0.289   | 0.460           |
| <b>s100b</b>                  | 3.908 (2.192) | 5.165 (2.558) | 130.000      | 0.149   | 1.025*          |
| <b>GFAP</b>                   | 14.62 (4.79)  | 13.78 (5.32)  | 157.000      | 0.515   | 0.406           |

**Supplementary Table S4. Performance on computerized cognitive tasks in PCS and healthy control participants.** Comparison of standardized deviation-from-expected (DFE) scores derived from the Cognitron cognitive task battery, assessing domains such as spatial reasoning, memory, motor control, and sustained attention. Scores represent z-standardized residuals relative to normative models controlling for age, sex, handedness, and ethnicity. Between-group differences were tested using independent samples t-tests, with corresponding p-values and Bayes Factors (BF<sub>10</sub>). Asterisks (\*) indicate results meeting the threshold for statistical significance (p < 0.05) or anecdotal Bayesian evidence (BF<sub>10</sub> > 1).

| Variable                                         | PCS Mean (SD)  | HC Mean (SD)   | Statistics   | P-value | B <sub>10</sub> |
|--------------------------------------------------|----------------|----------------|--------------|---------|-----------------|
| <b>Blocks_RT_DFE</b>                             | 0.136 (0.613)  | -0.043 (0.539) | T(38)=0.981  | 0.33    | 0.452           |
| <b>BlocksSummaryScore_DFE</b>                    | -0.706 (1.069) | -0.301 (1.011) | T(38)=-1.231 | 0.23    | 0.563           |
| <b>Lead_Balloon_SummaryScore_DFE</b>             | 0.576 (1.254)  | -0.038 (0.658) | T(38)=1.939  | 0.06    | 1.330*          |
| <b>2D_Manipulations_RT_DFE</b>                   | -0.006 (0.741) | 0.599 (1.892)  | T(38)=-1.332 | 0.20    | 0.621           |
| <b>2D_Manipulations_SummaryScore_DFE</b>         | 1.573 (1.484)  | 1.236 (1.711)  | T(38)=0.665  | 0.51    | 0.369           |
| <b>Motor_control_RT_DFE</b>                      | -0.097 (0.740) | -0.148 (0.766) | T(38)=0.214  | 0.83    | 0.314           |
| <b>Motor_Control_SummaryScore_DFE</b>            | -0.012 (0.772) | -0.122 (0.764) | T(38)=0.453  | 0.65    | 0.335           |
| <b>Objects_memory_delayed_RT_DFE</b>             | 0.416 (1.384)  | -0.458 (0.898) | T(38)=2.369  | 0.02*   | 2.653*          |
| <b>Objects_memory_delayed_SummaryScore_DFE</b>   | 0.073 (1.025)  | -0.386 (1.866) | T(38)=0.964  | 0.34    | 0.446           |
| <b>Objects_memory_immediate_RT_DFE</b>           | -0.106 (0.757) | -0.433 (0.840) | T(38)=1.293  | 0.20    | 0.596           |
| <b>Objects_memory_immediate_SummaryScore_DFE</b> | 0.023 (0.845)  | -0.006 (1.268) | T(38)=0.085  | 0.93    | 0.310           |
| <b>Spotter_RT_DFE</b>                            | 0.360 (1.302)  | -0.308 (0.841) | T(38)=1.927  | 0.06    | 1.303*          |

|                                          |                |                |              |      |       |
|------------------------------------------|----------------|----------------|--------------|------|-------|
| <b>Spotter_SummaryScore_DFE</b>          | 0.093 (0.175)  | 0.120 (0.361)  | T(38)=-0.301 | 0.77 | 0.320 |
| <b>Verbal_analogies_RT_DFE</b>           | 0.116 (0.743)  | -0.027 (0.916) | T(38)=-0.542 | 0.59 | 0.347 |
| <b>Verbal_analogies_SummaryScore_DFE</b> | -0.852 (1.355) | -0.592 (1.163) | T(38)=-0.651 | 0.52 | 0.366 |
